# Supplementary material for: Development and Evaluation of a Duo Zaire ebolavirus Real-Time RT-PCR Assay Targeting Two Regions within the Genome
Source: PubMed Central journal article supplement (PMC6956279; doi:10.3390/microorganisms7120652), 2019-12-04
Supplement: microorganisms-07-00652-s001.pdf [file microorganisms-07-00652-s001.pdf]

## Supplementary

| Huang assay (modified)              | 1007              | Forward primer | 1026 | 1032                 | Probe | 1056 | 1067        | Reverse primer | 1086 |
|-------------------------------------|-------------------|----------------|------|----------------------|-------|------|-------------|----------------|------|
|                                     | GCAGAGCAAGGACTGAT | TCA            | ///  | CAACAGCTTGGCAATCAGTT | GGACA | ///  | ATTTTCCGTTT | GATGCGAAC      |      |
|                                     | GCAGAGCAAGGACTGAT | ACA            |      |                      |       |      |             |                |      |
| MK163662.1_COD_2018_Ituri-BEN225    |                   |                | A    |                      |       | A    |             | T              |      |
| MK163647.1_COD_2018_Ituri-BEN031    |                   |                | A    |                      |       | A    |             | T              |      |
| MK007337.1_COD_2018_Ituri-MAN036    |                   |                | A    |                      |       | A    |             | T              |      |
| MK007331.1_COD_2018_Ituri-MAN002    |                   |                | A    |                      |       | A    |             | T              |      |
| MK007338.1_COD_2018_Ituri-MAN037    |                   |                | A    |                      |       | A    |             | T              |      |
| MK007334.1_COD_2018_Ituri-MAN020    |                   |                | A    |                      |       | A    |             | T              |      |
| MK007333.1_COD_2018_Ituri-MAN006    |                   |                | A    |                      |       | A    |             | T              |      |
| MK163644.1_COD_2018_Ituri-BEN017    |                   |                | A    |                      |       | A    |             | T              |      |
| MK163649.1_COD_2018_Ituri-BEN104    |                   |                | A    |                      |       | A    |             | T              |      |
| MK163650.1_COD_2018_Ituri-BEN114    |                   |                | A    |                      |       | A    |             | T              |      |
| MK163656.1_COD_2018_Ituri-BEN162    |                   |                | A    |                      |       | A    |             | T              |      |
| MK007330.1_COD_2018_Ituri-18FHV090  |                   |                | A    |                      |       | A    |             | T              |      |
| MK007341.1_COD_2018_Ituri-MAN042    |                   |                | A    |                      |       | A    |             | T              |      |
| MK731990.1_COD_2018_BEN164-MANA1-17 |                   |                | A    |                      |       | A    |             | T              |      |
| MK007342.1_COD_2018_Ituri-MAN046    |                   |                | A    |                      |       | A    |             | T              |      |
| MK007343.1_COD_2018_Ituri-MAN048    |                   |                | A    |                      |       | A    |             | T              |      |
| MK007332.1_COD_2018_Ituri-MAN003    |                   |                | A    |                      |       | A    |             | T              |      |
| MK007344.1_COD_2018_Ituri-MAN065    |                   |                | A    |                      |       | A    |             | T              |      |
| MK007340.1_COD_2018_Ituri-MAN040    |                   |                | A    |                      |       | A    |             | T              |      |
| MK007339.1_COD_2018_Ituri-MAN039    |                   |                | A    |                      |       | A    |             | T              |      |
| MK007335.1_COD_2018_Ituri-MAN025    |                   |                | A    |                      |       | A    |             | T              |      |
| MK088510.1_COD_2018_Ituri-MAN035    |                   |                | A    |                      |       | A    |             | T              |      |
| MK163645.1_COD_2018_Ituri-BEN018    |                   |                | A    |                      |       | A    |             | T              |      |
| MK163663.1_COD_2018_Ituri-BEN230    |                   |                | A    |                      |       | A    |             | T              |      |
| MK163646.1_COD_2018_Ituri-BEN020    |                   |                | A    |                      |       | A    |             | T              |      |
| MK163652.1_COD_2018_Ituri-BEN141    |                   |                | A    |                      |       | A    |             | T              |      |
| MK731993.1_COD_2018_BEN167-MANA5-11 |                   |                | A    |                      |       | A    |             | T              |      |
| MK163653.1_COD_2018_Ituri-BEN143    |                   |                | A    |                      |       | A    |             | T              |      |
| MK163654.1_COD_2018_Ituri-BEN146    |                   |                | A    |                      |       | A    |             | T              |      |
| MK731992.1_COD_2018_BEN165-MANA3-20 |                   |                | A    |                      |       | A    |             | T              |      |
| MK163648.1_COD_2018_Ituri-BEN070    |                   |                | A    |                      |       | A    |             | T              |      |
| MK163651.1_COD_2018_Ituri-BEN140    |                   |                | A    |                      |       | A    |             | T              |      |
| MK007329.1_COD_2018_Ituri-18FHV089  |                   |                | A    |                      |       | A    |             | T              |      |
| MK163655.1_COD_2018_Ituri-BEN148    |                   |                | A    |                      |       | A    |             | T              |      |
| MK163664.1_COD_2018_Ituri-BEN234    |                   |                | A    |                      |       | A    |             | T              |      |
| MK163666.1_COD_2018_Ituri-BEN240    |                   |                | A    |                      |       | A    |             | T              |      |
| MK163671.1_COD_2018_Ituri-BEN269    |                   |                | A    |                      |       | A    |             | T              |      |
| MK163670.1_COD_2018_Ituri-BEN268    |                   |                | A    |                      |       | A    |             | T              |      |
| MK163673.1_COD_2018_Ituri-BEN286    |                   |                | A    |                      |       | A    |             | T              |      |
| MK163675.1_COD_2018_Ituri-BEN294    |                   |                | A    |                      |       | A    |             | T              |      |
| MK163674.1_COD_2018_Ituri-BEN292    |                   |                | A    |                      |       | A    |             | T              |      |
| MK163672.1_COD_2018_Ituri-BEN274    |                   |                | A    |                      |       | A    |             | T              |      |
| MK163665.1_COD_2018_Ituri-BEN236    |                   |                | A    |                      |       | A    |             | T              |      |
| MK163669.1_COD_2018_Ituri-BEN267    |                   |                | A    |                      |       | A    |             | T              |      |
| MK163667.1_COD_2018_Ituri-BEN255    |                   |                | A    |                      |       | A    |             | T              |      |
| MK163661.1_COD_2018_Ituri-BEN214    |                   |                | A    |                      |       | A    |             | T              |      |
| MK163668.1_COD_2018_Ituri-BEN263    |                   |                | A    |                      |       | A    |             | T              |      |

**Figure S1.** Primers and probe described in the Huang et al. assay (and supplementary forward primer [this study]) matched against the multiple alignment dataset (nucleoprotein gene) representing EBOV strains during the 2018 outbreak in the North Kivu and Ituri Provinces of the Democratic Republic of the Congo. Y = C/T; S = C/G; K = G/T. Nucleotide positions refers to the sequence of Zaire ebolavirus genome (GenBank accession number MK007339).

| Gibb assay                          | 6348 | Forward primer | 6369    | 6402     | Probe | 6422               | 6440   | Reverse primer | 6459    |
|-------------------------------------|------|----------------|---------|----------|-------|--------------------|--------|----------------|---------|
|                                     | T    | GGGCT          | GAAAAYT | GCTACAAT | CT    | ACCAGCAGCGCCAGACGG | GTGCCG | STATG          | KACAAAG |
| MK163662.1_COD_2018_Ituri-BEN225    | .    | .              | .       | .        | .     | .                  | .      | .              | .       |
| MK163647.1_COD_2018_Ituri-BEN031    | .    | .              | .       | .        | .     | .                  | .      | .              | .       |
| MK007337.1_COD_2018_Ituri-MAN036    | .    | .              | .       | .        | .     | .                  | .      | .              | .       |
| MK007331.1_COD_2018_Ituri-MAN002    | .    | .              | .       | .        | .     | .                  | .      | .              | .       |
| MK007338.1_COD_2018_Ituri-MAN037    | .    | .              | .       | .        | .     | .                  | .      | .              | .       |
| MK007334.1_COD_2018_Ituri-MAN020    | .    | .              | .       | .        | .     | .                  | .      | .              | .       |
| MK007333.1_COD_2018_Ituri-MAN006    | .    | .              | .       | .        | .     | .                  | .      | .              | .       |
| MK163644.1_COD_2018_Ituri-BEN017    | .    | .              | .       | .        | .     | .                  | .      | .              | .       |
| MK163649.1_COD_2018_Ituri-BEN104    | .    | .              | .       | .        | .     | .                  | .      | .              | .       |
| MK163650.1_COD_2018_Ituri-BEN114    | .    | .              | .       | .        | .     | .                  | .      | .              | .       |
| MK163656.1_COD_2018_Ituri-BEN162    | .    | .              | .       | .        | .     | .                  | .      | .              | .       |
| MK007330.1_COD_2018_Ituri-18FHV090  | .    | .              | .       | .        | .     | .                  | .      | .              | .       |
| MK007341.1_COD_2018_Ituri-MAN042    | .    | .              | .       | .        | .     | .                  | .      | .              | .       |
| MK731990.1_COD_2018_BEN164-MANA1-17 | .    | .              | .       | .        | .     | .                  | .      | .              | .       |
| MK007342.1_COD_2018_Ituri-MAN046    | .    | .              | .       | .        | .     | .                  | .      | .              | .       |
| MK007343.1_COD_2018_Ituri-MAN048    | .    | .              | .       | .        | .     | .                  | .      | .              | .       |
| MK007332.1_COD_2018_Ituri-MAN003    | .    | .              | .       | .        | .     | .                  | .      | .              | .       |
| MK007344.1_COD_2018_Ituri-MAN065    | .    | .              | .       | .        | .     | .                  | .      | .              | .       |
| MK007340.1_COD_2018_Ituri-MAN040    | .    | .              | .       | .        | .     | .                  | .      | .              | .       |
| MK007339.1_COD_2018_Ituri-MAN039    | .    | .              | .       | .        | .     | .                  | .      | .              | .       |
| MK007335.1_COD_2018_Ituri-MAN025    | .    | .              | .       | .        | .     | .                  | .      | .              | .       |
| MK088510.1_COD_2018_Ituri-MAN035    | .    | .              | .       | .        | .     | .                  | .      | .              | .       |
| MK163645.1_COD_2018_Ituri-BEN018    | .    | .              | .       | .        | .     | .                  | .      | .              | .       |
| MK163663.1_COD_2018_Ituri-BEN230    | .    | .              | .       | .        | .     | .                  | .      | .              | .       |
| MK163646.1_COD_2018_Ituri-BEN020    | .    | .              | .       | .        | .     | .                  | .      | .              | .       |
| MK163652.1_COD_2018_Ituri-BEN141    | .    | .              | .       | .        | .     | .                  | .      | .              | .       |
| MK731993.1_COD_2018_BEN167-MANA5-11 | .    | .              | .       | .        | .     | .                  | .      | .              | .       |
| MK163653.1_COD_2018_Ituri-BEN143    | .    | .              | .       | .        | .     | .                  | .      | .              | .       |
| MK163654.1_COD_2018_Ituri-BEN146    | .    | .              | .       | .        | .     | .                  | .      | .              | .       |
| MK731992.1_COD_2018_BEN165-MANA3-20 | .    | .              | .       | .        | .     | .                  | .      | .              | .       |
| MK163648.1_COD_2018_Ituri-BEN070    | .    | .              | .       | .        | .     | .                  | .      | .              | .       |
| MK163651.1_COD_2018_Ituri-BEN140    | .    | .              | .       | .        | .     | .                  | .      | .              | .       |
| MK007329.1_COD_2018_Ituri-18FHV089  | .    | .              | .       | .        | .     | .                  | .      | .              | .       |
| MK163655.1_COD_2018_Ituri-BEN148    | .    | .              | .       | .        | .     | .                  | .      | .              | .       |
| MK163664.1_COD_2018_Ituri-BEN234    | .    | .              | .       | .        | .     | .                  | .      | .              | .       |
| MK163666.1_COD_2018_Ituri-BEN240    | .    | .              | .       | .        | .     | .                  | .      | .              | .       |
| MK163671.1_COD_2018_Ituri-BEN269    | .    | .              | .       | .        | .     | .                  | .      | .              | .       |
| MK163670.1_COD_2018_Ituri-BEN268    | .    | .              | .       | .        | .     | .                  | .      | .              | .       |
| MK163673.1_COD_2018_Ituri-BEN286    | .    | .              | .       | .        | .     | .                  | .      | .              | .       |
| MK163675.1_COD_2018_Ituri-BEN294    | .    | .              | .       | .        | .     | .                  | .      | .              | .       |
| MK163674.1_COD_2018_Ituri-BEN292    | .    | .              | .       | .        | .     | .                  | .      | .              | .       |
| MK163672.1_COD_2018_Ituri-BEN274    | .    | .              | .       | .        | .     | .                  | .      | .              | .       |
| MK163665.1_COD_2018_Ituri-BEN236    | .    | .              | .       | .        | .     | .                  | .      | .              | .       |
| MK163669.1_COD_2018_Ituri-BEN267    | .    | .              | .       | .        | .     | .                  | .      | .              | .       |
| MK163667.1_COD_2018_Ituri-BEN255    | .    | .              | .       | .        | .     | .                  | .      | .              | .       |
| MK163661.1_COD_2018_Ituri-BEN214    | .    | .              | .       | .        | .     | .                  | .      | .              | .       |
| MK163668.1_COD_2018_Ituri-BEN263    | .    | .              | .       | .        | .     | .                  | .      | .              | .       |

**Figure S2.** Primers and probe described in the Gibb et al. assay matched against the multiple alignment dataset (glycoprotein gene) representing EBOV strains during the 2018 outbreak in the North Kivu and Ituri Provinces of the Democratic Republic of the Congo. Y = C/T; S = C/G; K = G/T. Nucleotide positions refers to the sequence of Zaire ebolavirus genome (GenBank accession number MK007339).
